# Supplementary material
Source: PubMed Central journal article supplement (PMC4121387)

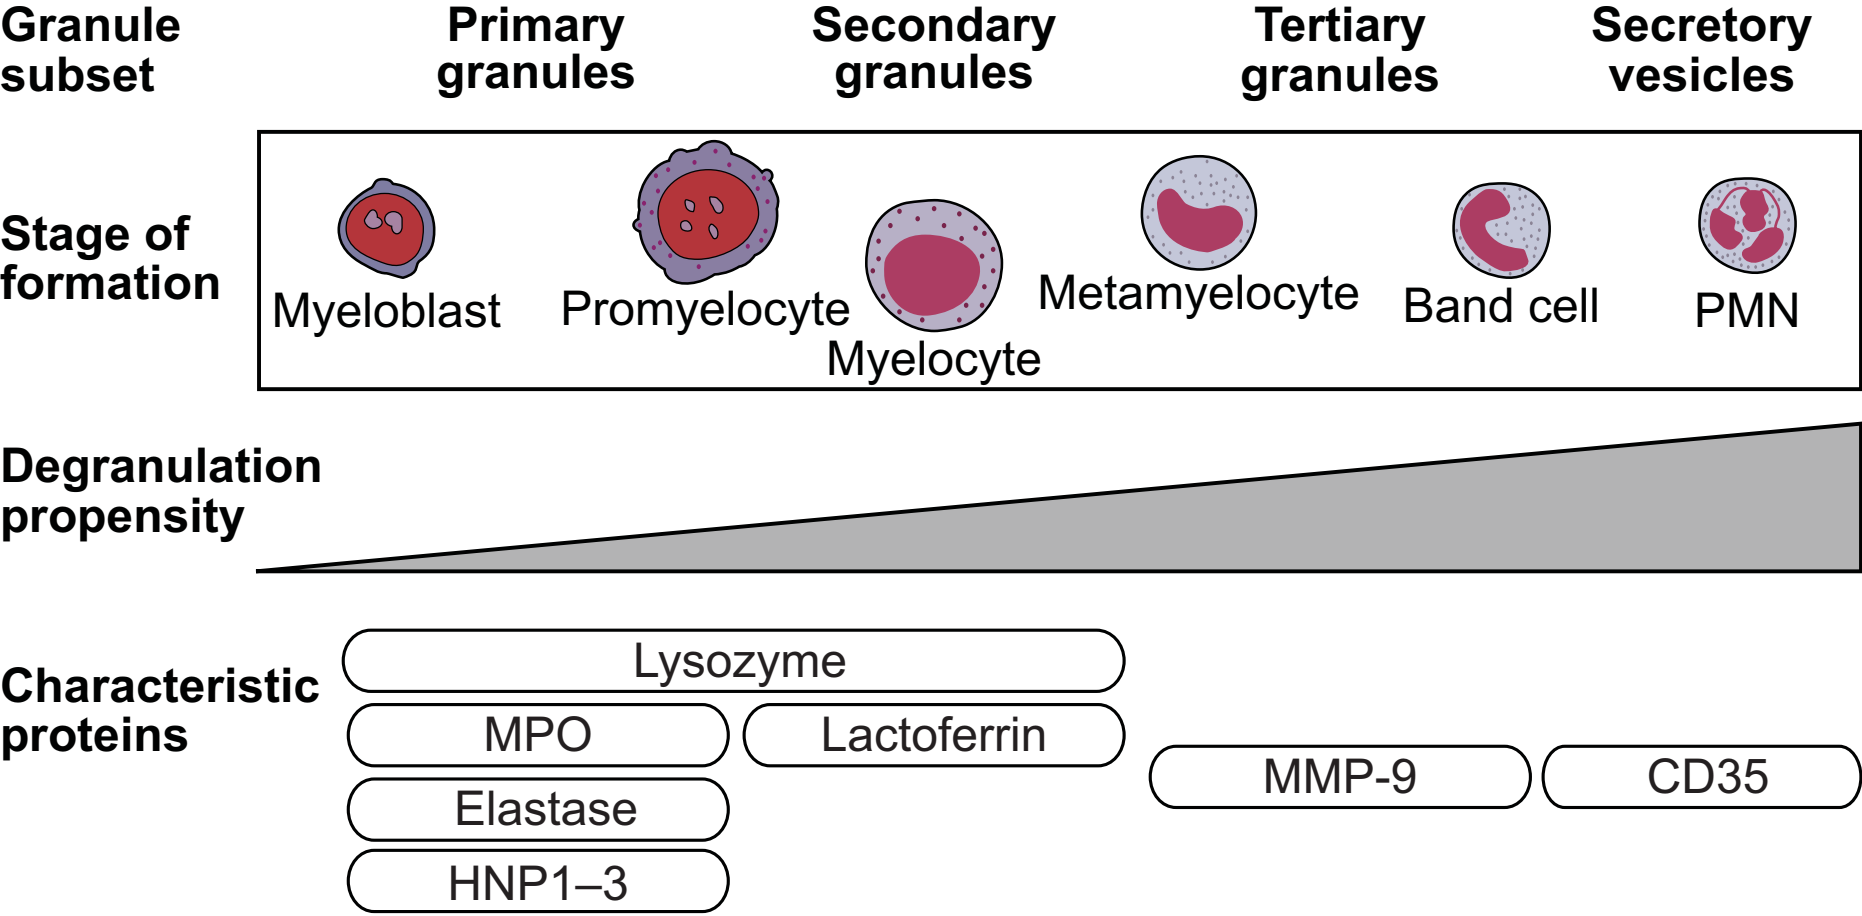

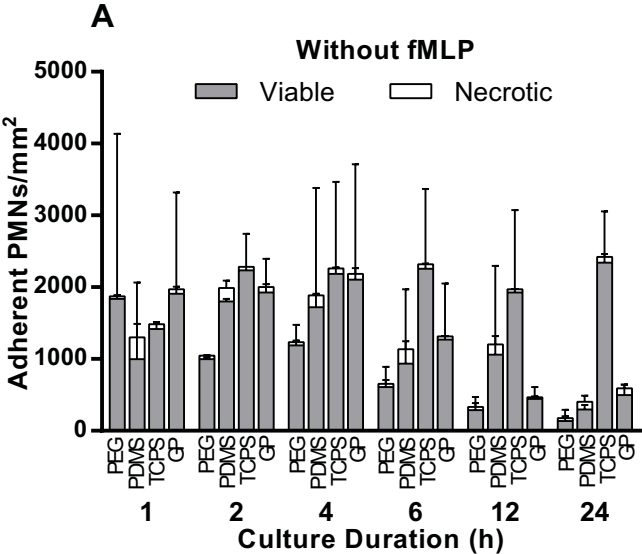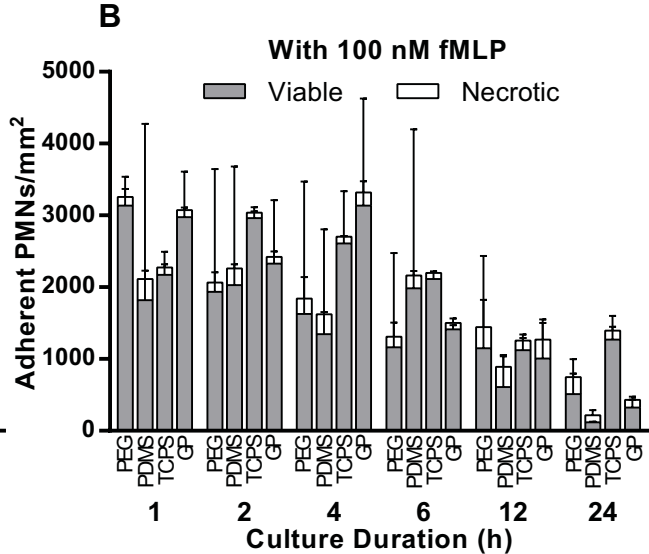

**A**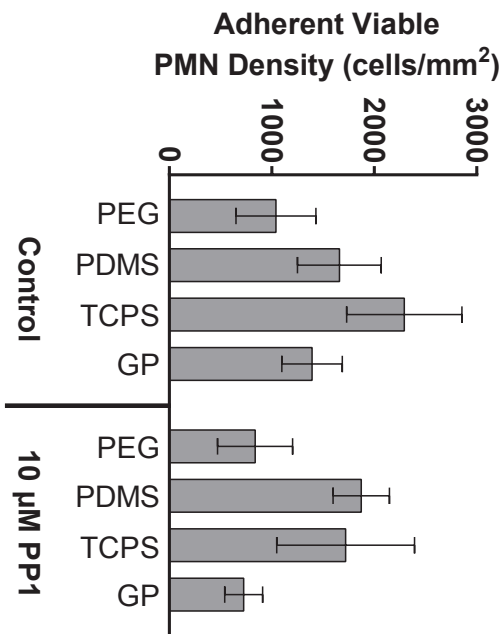**B**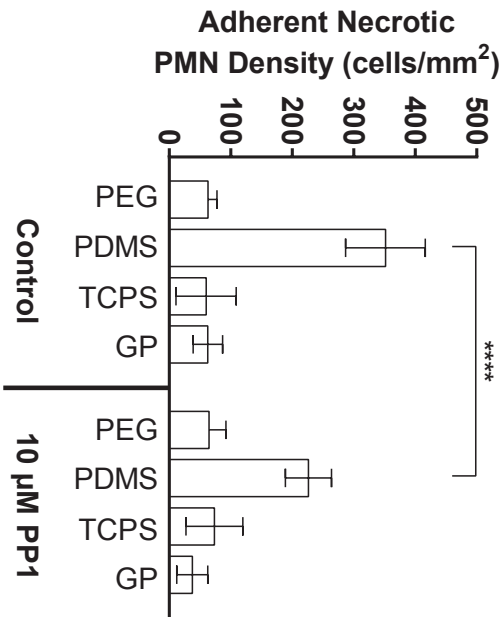

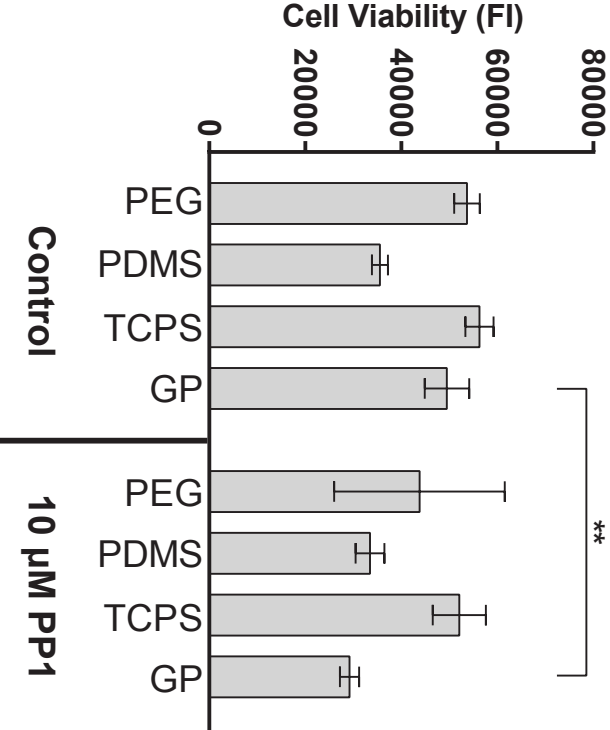

Transmigrated MCs/mm<sup>2</sup>

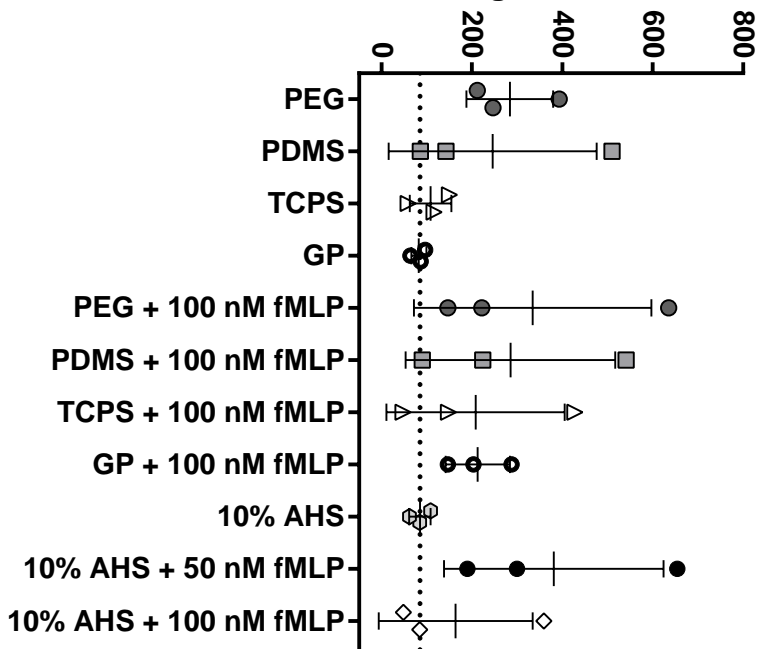

Supplement: NIHMS584594-supplement-Supp_FigureS1-S5.pdf [file NIHMS584594-supplement-Supp_FigureS1-S5.pdf]
